CORRECTION

# Correction: Do Media Use and Physical Activity Compete in Adolescents? Results of the MoMo Study

The *PLOS ONE* Staff

The Funding section is incorrect. The publisher apologizes for the error. The correct funding information is as follows: The study was funded by the German Bundesministerium für Bildung und Forschung (Federal Ministry of Education and Research) (Grant number: 01ER0810). The funders had no role in study design, data collection and analysis, decision to publish, or preparation of the manuscript.

## Reference

1. Spengler S, Mess F, Woll A (2015) Do Media Use and Physical Activity Compete in Adolescents? Results of the MoMo Study. *PLoS ONE* 10(12): e0142544. doi: [10.1371/journal.pone.0142544](https://doi.org/10.1371/journal.pone.0142544) PMID: [26629688](https://pubmed.ncbi.nlm.nih.gov/26629688/)

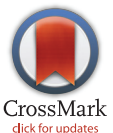

## OPEN ACCESS

**Citation:** The *PLOS ONE* Staff (2016) Correction: Do Media Use and Physical Activity Compete in Adolescents? Results of the MoMo Study. *PLoS ONE* 11(1): e0147093. doi:10.1371/journal.pone.0147093

**Published:** January 8, 2016

**Copyright:** © 2016 The PLOS ONE Staff. This is an open access article distributed under the terms of the [Creative Commons Attribution License](https://creativecommons.org/licenses/by/4.0/), which permits unrestricted use, distribution, and reproduction in any medium, provided the original author and source are credited.
